# Supplementary material for: Estimated exposure to perfluoroalkyl substances during infancy and serum-adipokine concentrations in later childhood
Source: PubMed Central journal article supplement (PMC10624607; doi:10.1038/s41390-023-02665-4), 2023-06-14
Supplement: 41390_2023_2665_MOESM1_ESM.pdf [file 41390_2023_2665_MOESM1_ESM.pdf]

## Supplemental

Supplemental Table 1. Association of a doubling in serum-PFAS concentration at three different infancy ages with a change (in %) in *leptin receptor* and the *leptin/leptin receptor ratio* concentration at 9 years, with confidence intervals (CI) and probability (p) values also for sex interaction.

| Exposure | Age (months) | Leptin receptor |              |          | Leptin/leptin receptor ratio |        |                |          |                         |
|----------|--------------|-----------------|--------------|----------|------------------------------|--------|----------------|----------|-------------------------|
|          |              | Change          | 95% CI       | <i>p</i> | <i>P</i> <sub>sex</sub>      | Change | 95% CI         | <i>p</i> | <i>P</i> <sub>sex</sub> |
| PFOA     | 3            | 0.36            | -8.14 ; 6.48 | 0.92     | 0.07                         | -8.28  | -24.68 ; 11.70 | 0.390    | 0.476                   |
|          | 6            | 0.79            | -6.33 ; 6.75 | 0.81     | 0.10                         | -5.80  | -20.88 ; 12.16 | 0.502    | 0.577                   |
|          | 12           | 0.75            | -5.14 ; 5.88 | 0.78     | 0.16                         | -3.73  | -16.88 ; 11.49 | 0.611    | 0.756                   |
| PFNA     | 3            | -2.95           | -11.2 ; 6.05 | 0.51     | 0.47                         | 9.34   | -13.54 ; 38.28 | 0.456    | 0.060                   |
|          | 6            | -1.88           | -9.18 ; 6.00 | 0.63     | 0.52                         | 8.71   | -11.44 ; 33.44 | 0.425    | 0.106                   |
|          | 12           | -0.88           | -6.65 ; 5.24 | 0.77     | 0.56                         | 5.85   | -9.99 ; 24.48  | 0.492    | 0.247                   |
| PFDA     | 3            | -4.42           | -14.7 ; 7.09 | 0.44     | 0.13                         | 13.48  | -13.01 ; 48.05 | 0.351    | 0.052                   |
|          | 6            | -3.91           | -13.6 ; 6.86 | 0.46     | 0.14                         | 14.10  | -11.26 ; 46.71 | 0.304    | 0.066                   |
|          | 12           | -2.09           | -10.1 ; 6.68 | 0.63     | 0.20                         | 10.41  | -10.85 ; 36.73 | 0.364    | 0.134                   |
| PFHxS    | 3            | 5.13            | -0.40 ; 11.0 | 0.07     | 0.25                         | 5.60   | -6.48 ; 19.25  | 0.379    | 0.018                   |
|          | 6            | 3.57            | -0.82 ; 8.16 | 0.11     | 0.35                         | 4.22   | -5.77 ; 15.25  | 0.422    | 0.069                   |
|          | 12           | 2.06            | -1.23 ; 5.46 | 0.22     | 0.46                         | 2.80   | -5.37 ; 11.66  | 0.513    | 0.195                   |
| PFOS     | 3            | -6.42           | -13.7 ; 1.50 | 0.11     | 0.11                         | 22.10  | -2.40 ; 52.74  | 0.081    | 0.013                   |
|          | 6            | -4.52           | -11.0 ; 2.48 | 0.20     | 0.18                         | 17.74  | -2.97 ; 42.86  | 0.098    | 0.042                   |
|          | 12           | -2.78           | -8.19 ; 2.95 | 0.34     | 0.26                         | 11.76  | -4.63 ; 30.96  | 0.169    | 0.133                   |

## LEGEND

Supplemental Figure 1. Percent change of serum-adipokine hormone concentrations at age 9 years per doubling of the estimated PFAS concentrations at birth and 3, 6, and 12 months in males (green) and females (orange). For comparison, results from serum-PFAS at birth and 18 months<sup>1</sup> are also shown.

- 1 Shih, Y. H., Blomberg, A. J., Jorgensen, L. H., Weihe, P. & Grandjean, P. Early-Life Exposure to Perfluoroalkyl Substances in Relation to Serum Adipokines in a Longitudinal Birth Cohort. *Environ Res* **204**, 111905 (2022).
